# Supplementary material for: Saudi Arabia’s Healthy Food Strategy: Progress & Hurdles in the 2030 Road
Source: MDPI journal article supplement (doi:10.3390/nu13072130), 2021-06-22
Supplement: s1 [file s1]

## Saudi Arabia's Healthy Food Strategy: Progress & Hurdles in the 2030 Road

### Supplementary Material

*Supplementary Table 1: Food category of products n (%) adopting FoPNL*

| Categories            | Multiple Traffic Lights (n=48) | Health Star Rating (n=1) | Guidelines Daily Allowance (n= 71) |
|-----------------------|--------------------------------|--------------------------|------------------------------------|
| <b>Beverages</b>      | 17 (35.4)                      | 0 (0)                    | 19 (27.1)                          |
| <b>Cereals</b>        | 1 (2.1)                        | 0 (0)                    | 11 (15.7)                          |
| <b>Confectionary</b>  | 11 (22.9)                      | 0 (0)                    | 5 (7.1)                            |
| <b>Dairy Products</b> | 10 (20.8)                      | 1 (100)                  | 17 (24.3)                          |
| <b>Sweet Spreads</b>  | 5 (10.4)                       | 0 (0)                    | 9 (12.9)                           |
| <b>Others</b>         | 4 (8.3)                        | 0 (0)                    | 9 (12.9)                           |

FoPNL: Front of Pack Nutrient Label

*Supplementary Table 1: Nutrients categorization based on the Multiple Traffic Light' criteria*

| Categories           | Green   | Amber   | Red       |
|----------------------|---------|---------|-----------|
| <b>Sugar</b>         | 9 (19)  | 19 (40) | 20 (42)   |
| <b>Salt</b>          | 44 (92) | 3 (5.8) | 1 (1.9)   |
| <b>Total Fat</b>     | 31 (65) | 5 (10)  | 19 (27.1) |
| <b>Saturated Fat</b> | 31 (65) | 0 (0)   | 11 (15.7) |

Green: Low level; Amber: Moderate level, Red: Elevated level
